# Supplementary material for: Phospholipid profiling enables to discriminate tumor- and non-tumor-derived human colon epithelial cells: Phospholipidome similarities and differences in colon cancer cell lines and in patient-derived cell samples
Source: PubMed Central journal article supplement (PMC6992008; doi:10.1371/journal.pone.0228010), 2020-01-30
Supplement: pone.0228010.s003.pdf [file pone.0228010.s003.pdf]

◆ NCM 460    □ FHC    ▲ AA/C1    ○ HT-29    ✕ RG/C2  
 ▲ AA/C1/SB10    + HCT-116    ◇ SW480    — SW620

### TAG

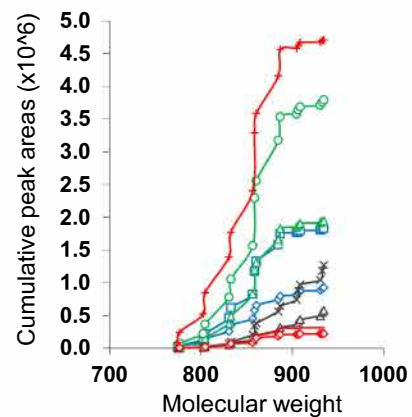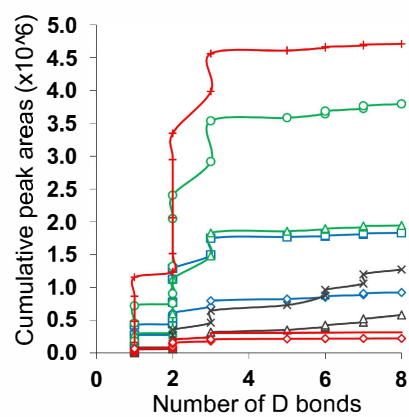

### CholE

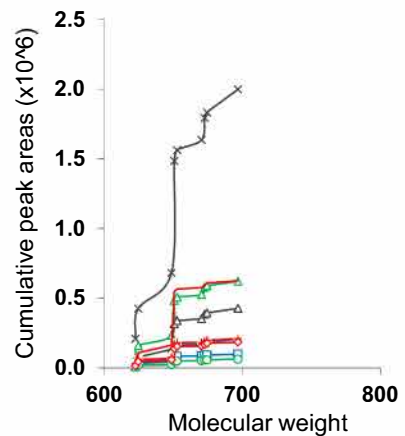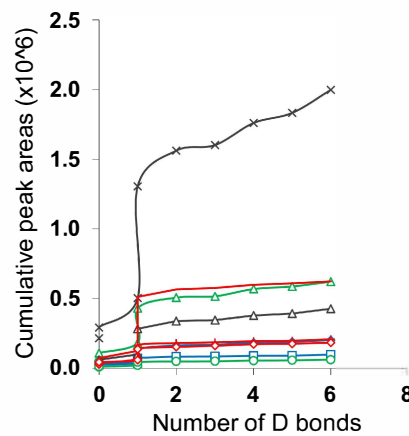

**S3 Fig. Relation between molecular weights or number of double (D) bonds and peak area in TAGs and CholE.** Cumulative peak areas (primary data) according to lipid species molecular weights and number of double (D) bonds within triacylglycerols (TAG) and cholesterol-esters (CholE) are shown for all colon epithelial cell lines.
