# Supplementary material for: Phospholipid profiling enables to discriminate tumor- and non-tumor-derived human colon epithelial cells: Phospholipidome similarities and differences in colon cancer cell lines and in patient-derived cell samples
Source: PubMed Central journal article supplement (PMC6992008; doi:10.1371/journal.pone.0228010), 2020-01-30
Supplement: pone.0228010.s005.pdf [file pone.0228010.s005.pdf]

**Suppl. Table 1:** Analysis of variance of peak areas (log-scale)

| Source               | d.f. | SS       | SS (%) | MS     | p      | Coef. variance <sup>1</sup> | Homogeneity of variance <sup>2</sup> |
|----------------------|------|----------|--------|--------|--------|-----------------------------|--------------------------------------|
| Line                 | 8    | 1094.88  | 6.05%  | 136.86 | <0.001 | 16.3% - 20.9%               | F=1.42 <i>p</i> =0.184               |
| Compound             | 120  | 15484.75 | 85.60% | 129.04 | <0.001 | 2.2% - 22.1%                |                                      |
| Line x Compound      | 960  | 1490.69  | 8.24%  | 1.55   | <0.001 |                             |                                      |
| Compound x Replicate | 242  | 2.35     | 0.01%  | 0.01   | 0.106  |                             |                                      |
| Error                | 1935 | 16.76    | 0.09%  | 0.01   |        |                             |                                      |
| Total                | 3266 | 18089.44 |        |        |        |                             |                                      |

A detailed analysis of repeated estimates (3 independent repeats) of phospholipid profiles confirmed a high degree of repeatability of the experimental outcomes. Analysis of variance (performed on log-scaled peak areas) revealed coefficient of variance in the range of 16.1 – 22.1% which confirms effective normalization of the peak data base on logarithmic transformation. Random error exhausted only 0.09% of the overall experimental variance (calculated as a proportion of the total sum of squares). Furthermore, test of homogeneity of variance among compared cell lines proved acceptable homogeneity ( $p = 0.184$ ) which enables a direct comparison of lipid profiles among lines.

<sup>1</sup> range of coefficients of variance in given stratification

<sup>2</sup> Levene test

d.f. degrees of freedom; SS sum of squares; MS mean sum of squares
