# Supplementary material for: Phospholipid profiling enables to discriminate tumor- and non-tumor-derived human colon epithelial cells: Phospholipidome similarities and differences in colon cancer cell lines and in patient-derived cell samples
Source: PubMed Central journal article supplement (PMC6992008; doi:10.1371/journal.pone.0228010), 2020-01-30
Supplement: pone.0228010.s006.pdf [file pone.0228010.s006.pdf]

**Suppl. Table 2:** Suggested fatty acid (FA) pattern of phosphatidylcholine (PC), phosphatidylethanolamine (PE), phosphatidylserine (PS) and phosphatidylinositol (PI) species according to their molecular weights identified in colon cellular models.

| MW        | <i>m/z</i><br>[M+H] <sup>+</sup> | Total FA carbons<br>and double bonds | Fatty acid variations of respective lipid species |                 |                 |            |
|-----------|----------------------------------|--------------------------------------|---------------------------------------------------|-----------------|-----------------|------------|
| <b>PC</b> |                                  |                                      |                                                   |                 |                 |            |
| 691.7     | 692.7                            | 30:0                                 | 14:0(pla)//16:0                                   |                 |                 |            |
| 705.7     | 706.7                            | 30:0                                 | 12:0//18:0                                        | 14:0//16:0      |                 |            |
| 717.7     | 718.7                            | 32:1                                 | 14:0(pla)//18:1                                   |                 |                 |            |
| 719.7     | 720.7                            | 32:0                                 | 14:0(pla)//18:0                                   |                 |                 |            |
| 731.7     | 732.7                            | 32:1                                 | 14:0//18:1                                        | 16:0//16:1      |                 |            |
| 733.7     | 734.7                            | 32:0                                 | 14:0//18:0                                        |                 |                 |            |
| 745.7     | 746.7                            | 34:1                                 | 14:0(pla)//20:1                                   | 16:0(pla)//18:1 |                 |            |
| 757.7     | 758.7                            | 34:2                                 | 16:0//18:2                                        |                 |                 |            |
| 759.7     | 760.7                            | 34:1                                 | 16:0//18:1                                        |                 |                 |            |
| 771.8     | 772.8                            | 36:2                                 | 14:0(pla)//22:2                                   | 16:0(pla)//20:2 | 18:0(pla)//18:2 |            |
| 773.8     | 774.8                            | 36:1                                 | 14:0(pla)//22:1                                   | 16:0(pla)//20:1 | 18:0(pla)//18:1 |            |
| 783.7     | 784.7                            | 36:3                                 | 16:0//20:3                                        |                 |                 |            |
| 785.8     | 786.8                            | 36:2                                 | 16:1//20:1                                        |                 |                 |            |
| 787.8     | 788.8                            | 36:1                                 | 16:0//20:1                                        |                 |                 |            |
| 805.7     | 806.7                            | 38:6                                 | 18:2//20:4                                        |                 |                 |            |
| 807.7     | 808.7                            | 38:5                                 | 18:1//20:4                                        | 18:2//20:3      | 18:3//20:2      | 18:0//20:5 |
| 809.8     | 810.8                            | 38:4                                 | 18:0//20:4                                        |                 |                 |            |
| 831.7     | 832.7                            | 40:7                                 | 20:4//20:3                                        |                 |                 |            |
| 833.8     | 834.8                            | 40:6                                 | 20:3//20:3                                        |                 |                 |            |
| 835.8     | 836.8                            | 40:5                                 | 20:1//20:4                                        |                 |                 |            |
| <b>PE</b> |                                  |                                      |                                                   |                 |                 |            |
| 689.5     | 690.5                            | 32:1                                 | 16:0//16:1                                        |                 |                 |            |
| 715.5     | 716.5                            | 34:2                                 | 16:0//18:2                                        |                 |                 |            |
| 717.5     | 718.5                            | 34:1                                 | 16:0//18:1                                        |                 |                 |            |
| 729.5     | 730.5                            | 36:2                                 | 14:0ple//22:1                                     | 16:0ple//20:1   | 18:0ple//18:1   |            |
| 731.6     | 732.6                            | 36:1                                 | 14:0ple//22:0                                     | 16:0ple//20:0   | 18:0ple//18:0   |            |
| 741.5     | 742.5                            | 36:3                                 | 16:0//20:3                                        |                 |                 |            |
| 743.6     | 744.6                            | 36:2                                 | 20:1//16:1                                        |                 |                 |            |
| 745.6     | 746.6                            | 36:1                                 | 20:1//16:0                                        |                 |                 |            |
| 747.6     | 748.6                            | 36:0                                 | 20:0//16:0                                        |                 |                 |            |
| 763.5     | 764.5                            | 38:6                                 | 20:4//18:2                                        |                 |                 |            |
| 765.5     | 766.5                            | 38:5                                 | 20:4//18:1                                        |                 |                 |            |
| 767.5     | 768.5                            | 38:4                                 | 20:4//18:0                                        |                 |                 |            |
| 769.6     | 770.6                            | 38:3                                 | 20:1//18:2                                        |                 |                 |            |
| 771.6     | 772.6                            | 38:2                                 | 22:1//16:1                                        |                 |                 |            |
| 789.5     | 790.5                            | 40:7                                 | 20:4//20:3                                        |                 |                 |            |
| 791.6     | 792.6                            | 40:6                                 | 20:3//20:3                                        |                 |                 |            |
| 799.6     | 800.6                            | 40:2                                 | 22:0//18:2                                        | 20:1//20:1      | 22:1//18:1      | 24:1//16:1 |
| 801.6     | 802.6                            | 40:1                                 | 20:0//20:1                                        |                 |                 |            |
| 827.6     | 828.6                            | 42:2                                 | 22:1//20:1                                        |                 |                 |            |
| 829.7     | 830.7                            | 42:1                                 | 22:1//20:0                                        |                 |                 |            |

| MW        | <i>m/z</i><br>[M+H] <sup>+</sup>                | Total FA carbons<br>and double bonds | Fatty acid variations of respective lipid species |               |               |            |
|-----------|-------------------------------------------------|--------------------------------------|---------------------------------------------------|---------------|---------------|------------|
| <b>PI</b> |                                                 |                                      |                                                   |               |               |            |
| 808.6     | 826.6                                           | 32:1                                 | 16:0//16:1                                        | 14:0//18:1    |               |            |
| 834.5     | 852.5                                           | 34:2                                 | 16:0//18:2                                        | 16:1//18:0    |               |            |
| 836.6     | 854.6                                           | 34:1                                 | 16:0//18:1                                        | 16:1//18:0    |               |            |
| 848.6     | 866.6                                           | 36:2                                 | 18:0pla//18:2                                     | 16:0pla//20:2 | 14:0pla//22:2 |            |
| 850.7     | 868.7                                           | 36:1                                 | 16:0pla//20:1                                     | 14:0pla//22:1 | 18:0pla//18:1 |            |
| 858.6     | 876.6                                           | 36:5                                 | 18:2//18:2                                        | 16:0//20:4    | 16:1//20:3    |            |
| 860.6     | 878.6                                           | 36:3                                 | 18:1//18:2                                        | 16:0//20:3    | 18:0//18:3    |            |
| 862.6     | 880.6                                           | 36:2                                 | 20:1//16:1                                        | 18:0//18:2    | 18:1//18:1    |            |
| 864.6     | 882.6                                           | 36:1                                 | 20:1//16:0                                        | 16:1//20:0    | 18:0//18:1    |            |
| 874.5     | 892.5                                           | 38:3                                 | 20:0pla//18:3                                     | 18:0pla//20:3 | 16:0pla//22:3 |            |
| 876.6     | 894.6                                           | 38:2                                 | 20:0pla//18:2                                     | 18:0pla//22:2 |               |            |
| 884.6     | 902.6                                           | 38:5                                 | 18:1//20:4                                        | 18:2//20:3    | 18:0//20:5    | 16:0//22:5 |
| 886.6     | 904.6                                           | 38:4                                 | 18:0//20:4                                        | 18:1//20:3    | 18:2//20:2    | 16:0//22:4 |
| 888.7     | 906.7                                           | 38:3                                 | 18:0//20:3                                        | 18:1//20:2    | 18:2//20:1    | 16:0//22:3 |
| 890.7     | 908.7                                           | 38:2                                 | 18:0//20:2                                        | 18:1//20:1    | 18:2//20:0    | 16:0//22:2 |
| 908.5     | 926.5                                           | 40:7                                 | 20:4//20:3                                        | 18:1//22:6    |               |            |
| 910.7     | 928.7                                           | 40:6                                 | 20:3//20:3                                        | 20:2//20:4    | 18:0//22:6    |            |
| 912.6     | 930.6                                           | 40:5                                 | 20:0//20:5                                        | 20:1//20:4    | 20:2//20:3    |            |
| 914.7     | 932.7                                           | 40:4                                 | 20:0//20:4                                        | 20:1//20:3    | 20:2//20:2    | 18:0//22:4 |
| MW        | <i>m/z</i><br>[M+NH <sub>4</sub> ] <sup>+</sup> | Total FA carbons<br>and double bonds | Fatty acid variations of respective lipid species |               |               |            |
| <b>PS</b> |                                                 |                                      |                                                   |               |               |            |
| 733.5     | 734.5                                           | 32:1                                 | 16:0//16:1                                        | 14:0//18:1    |               |            |
| 735.5     | 736.5                                           | 32:0                                 | 16:0//16:0                                        | 14:0//18:0    |               |            |
| 747.6     | 748.6                                           | 34:1                                 | 16:0pla//18:1                                     | 18:0pla//16:1 |               |            |
| 759.6     | 760.6                                           | 34:2                                 | 16:0//18:2                                        | 16:1//18:1    |               |            |
| 761.6     | 762.6                                           | 34:1                                 | 18:0//18:1                                        | 16:1//18:0    |               |            |
| 773.6     | 774.6                                           | 36:2                                 | 18:0pla//18:2                                     | 16:0pla//20:2 |               |            |
| 775.6     | 776.6                                           | 36:1                                 | 16:0pla//20:1                                     | 20:0pla//16:1 | 18:0pla//18:1 |            |
| 785.6     | 786.6                                           | 36:3                                 | 20:2//16:1                                        | 18:1//18:2    | 18:0//18:3    | 20:3//16:0 |
| 787.6     | 788.6                                           | 36:2                                 | 20:1//16:1                                        | 18:0//18:2    | 18:1//18:1    | 20:2//16:0 |
| 789.6     | 790.6                                           | 36:1                                 | 20:1//16:0                                        | 20:0//16:1    | 18:0//18:1    |            |
| 809.6     | 810.6                                           | 38:5                                 | 20:4//18:1                                        | 20:5//18:0    | 22:4//16:1    | 22:5//16:0 |
| 811.6     | 812.6                                           | 38:4                                 | 20:4//18:0                                        | 20:3//18:1    | 22:3//16:1    | 22:4//16:0 |
| 815.6     | 816.6                                           | 38:2                                 | 20:2//18:0                                        | 20:1//18:1    | 22:1//16:1    | 22:2//16:0 |
| 817.6     | 818.6                                           | 38:1                                 | 20:1//18:0                                        | 20:0//18:1    | 22:0//16:1    | 22:1//16:0 |
| 833.7     | 834.7                                           | 40:7                                 | 20:4//20:3                                        | 22:6//18:1    |               |            |
| 835.6     | 836.6                                           | 40:6                                 | 20:3//20:3                                        | 22:6//18:0    | 22:5//18:1    |            |
| 837.6     | 838.6                                           | 40:5                                 | 20:1//20:4                                        | 22:5//18:0    | 22:4//18:1    |            |
| 845.6     | 846.6                                           | 40:1                                 | 20:0//20:1                                        | 22:1//18:0    | 24:1//16:0    | 22:0//18:1 |
| 873.7     | 874.7                                           | 42:1                                 | 22:1//20:0                                        | 22:0//20:1    | 24:0//18:1    | 24:1//18:0 |

**Annotation:**

fatty acid annotation: x:y // x:y - x=carbon number; y=double bond number;

fatty acids are attached via ester bonds in most of the analyzed species: -O-CO-R;

ple - fatty acid attached via vinyl bond: -O-CH=CH-R [1 of 2];

pla - fatty acid attached via alkyl ether bond: -O-R [1 of 2]
